# Supplementary material for: A New Pooling Method for Cnn-based Deep Learning Models
Source: Research Square preprint supplement (doi:10.21203/rs.3.rs-5871802/v1), 2025-02-11
Supplement: Supplementary file 1 [file be5e9e6bc458c87d2545250e.docx]

**Supplementary Table S1**. **Accuracy, Train Loss, and Test Loss Values for Varied Alpha Values in the CNN Model**

| **Poolalpha** | **Train_Loss** | **Test_Loss** | **Accuracy** |
| --- | --- | --- | --- |
| 0,1 | 0,94 | 1,22 | 58,4 |
| 0,11 | 0,98 | 1,25 | 56,9 |
| 0,12 | 0,98 | 1,24 | 57,1 |
| 0,13 | 0,95 | 1,2 | 58,7 |
| 0,14 | 0,93 | 1,23 | 57,6 |
| 0,15 | 0,96 | 1,23 | 57,7 |
| 0,16 | 0,98 | 1,23 | 57,9 |
| 0,17 | 1,01 | 1,29 | 55 |
| 0,18 | 0,99 | 1,21 | 57,5 |
| 0,19 | 0,96 | 1,26 | 57,2 |
| 0,2 | 0,93 | 1,22 | 57,5 |
| 0,21 | 0,98 | 1,2 | 58,3 |
| 0,22 | 0,95 | 1,26 | 57,3 |
| 0,23 | 0,95 | 1,18 | 59,12 |
| 0,24 | 0,91 | 1,17 | 59,3 |
| 0,25 | 0,97 | 1,25 | 57,2 |
| 0,26 | 0,93 | 1,24 | 58,2 |
| 0,27 | 0,93 | 1,2 | 58,5 |
| 0,28 | 0,92 | 1,22 | 58,9 |
| 0,29 | 0,97 | 1,2 | 58,5 |
| 0,3 | 0,91 | 1,15 | 59,84 |
| 0,31 | 1,03 | 1,21 | 57,6 |
| 0,32 | 0,92 | 1,28 | 57,3 |
| 0,33 | 0,94 | 1,18 | 59,5 |
| 0,34 | 0,93 | 1,18 | 59 |
| 0,35 | 0,92 | 1,2 | 59,4 |
| 0,36 | 0,95 | 1,17 | 59,2 |
| 0,37 | 0,94 | 1,18 | 59,1 |
| 0,38 | 0,96 | 1,2 | 58,3 |
| 0,39 | 0,93 | 1,17 | 59,2 |
| 0,4 | 0,93 | 1,2 | 58,1 |
| 0,41 | 0,92 | 1,16 | 60,34 |
| 0,42 | 0,92 | 1,2 | 59,3 |
| 0,43 | 0,94 | 1,21 | 58,9 |
| 0,44 | 0,89 | 1,17 | 59,6 |
| 0,45 | 0,94 | 1,17 | 58,8 |
| 0,46 | 1,002 | 1,2 | 58,2 |
| 0,47 | 0,95 | 1,2 | 58,1 |
| 0,48 | 0,93 | 1,21 | 59,03 |
| 0,49 | 0,93 | 1,2 | 57,8 |
| 0,5 | 0,92 | 1,17 | 60,51 |
| 0,51 | 0,88 | 1,16 | 61 |
| 0,52 | 0,93 | 1,22 | 58,08 |
| 0,53 | 0,93 | 1,19 | 58,8 |
| 0,54 | 0,91 | 1,14 | 59,5 |
| 0,55 | 0,87 | 1,15 | 60,8 |
| 0,56 | 0,93 | 1,16 | 60,09 |
| 0,57 | 0,9 | 1,19 | 59,4 |
| 0,58 | 0,9 | 1,19 | 59,7 |
| 0,59 | 0,91 | 1,17 | 59,2 |
| 0,6 | 0,94 | 1,19 | 58,6 |
| 0,61 | 0,91 | 1,17 | 60 |
| 0,62 | 0,88 | 1,13 | 61,09 |
| 0,63 | 0,93 | 1,19 | 59,1 |
| 0,64 | 0,85 | 1,12 | 61,5 |
| 0,65 | 0,87 | 1,15 | 60,9 |
| 0,66 | 0,87 | 1,15 | 60,7 |
| 0,67 | 0,85 | 1,14 | 61,08 |
| 0,68 | 0,86 | 1,16 | 60,06 |
| 0,69 | 0,89 | 1,16 | 60,55 |
| 0,7 | 0,9 | 1,16 | 60 |
| 0,71 | 0,93 | 1,19 | 59,06 |
| 0,72 | 0,86 | 1,12 | 61,68 |
| 0,73 | 0,87 | 1,14 | 60,8 |
| 0,74 | 0,93 | 1,21 | 58,5 |
| 0,75 | 0,84 | 1,093 | 62,93 |
| 0,76 | 0,94 | 1,19 | 59,3 |
| 0,77 | 0,91 | 1,14 | 60,89 |
| 0,78 | 0,88 | 1,15 | 60,9 |
| 0,79 | 0,91 | 1,17 | 59,5 |
| 0,8 | 0,86 | 1,15 | 60,2 |
| 0,81 | 0,92 | 1,18 | 59,3 |
| 0,82 | 0,88 | 1,17 | 60,4 |
| 0,83 | 0,87 | 1,14 | 61,25 |
| 0,84 | 0,85 | 1,13 | 61,8 |
| 0,85 | 1,01 | 1,23 | 57,5 |
| 0,86 | 0,87 | 1,16 | 60,2 |
| 0,87 | 0,89 | 1,17 | 60,8 |
| 0,88 | 0,87 | 1,21 | 58,4 |
| 0,89 | 0,84 | 1,16 | 61,2 |
| 0,9 | 0,93 | 1,18 | 59,69 |
| 0,91 | 0,87 | 1,15 | 60,8 |
| 0,92 | 0,91 | 1,17 | 60,4 |
| 0,93 | 0,88 | 1,17 | 60,4 |
| 0,94 | 0,84 | 1,14 | 61,17 |
| 0,95 | 0,92 | 1,2 | 59,11 |
| 0,96 | 0,83 | 1,13 | 61,4 |
| 0,97 | 0,83 | 1,12 | 61,8 |
| 0,98 | 0,8 | 1,14 | 61,5 |
| 0,99 | 0,84 | 1,13 | 61,17 |

**Supplementary Table S2**. **Accuracy, Train Loss, and Test Loss Values for Alpha Values in the U-Net Model**

| **Poolalpha** | **Train_Loss** | **Test_Loss** | **Accuracy** |
| --- | --- | --- | --- |
| 0,1 | 0,84 | 1,17 | 60,1 |
| 0,11 | 0,86 | 1,21 | 60,18 |
| 0,12 | 0,82 | 1,17 | 63,17 |
| 0,13 | 0,84 | 1,12 | 62,72 |
| 0,14 | 0,84 | 1,12 | 62,93 |
| 0,15 | 0,83 | 1,19 | 62,23 |
| 0,16 | 0,83 | 1,18 | 61,21 |
| 0,17 | 0,81 | 1,14 | 62 |
| 0,18 | 0,8 | 1,18 | 62,68 |
| 0,19 | 0,81 | 1,13 | 62,88 |
| 0,2 | 0,82 | 1,15 | 62,27 |
| 0,21 | 0,8 | 1,08 | 64,26 |
| 0,22 | 0,82 | 1,15 | 61,93 |
| 0,23 | 0,81 | 1,14 | 62,25 |
| 0,24 | 0,8 | 1,11 | 64,04 |
| 0,25 | 0,82 | 1,13 | 63,15 |
| 0,26 | 0,81 | 1,15 | 62,82 |
| 0,27 | 0,79 | 1,15 | 62,84 |
| 0,28 | 0,79 | 1,11 | 63,8 |
| 0,29 | 0,78 | 1,1 | 63,02 |
| 0,3 | 0,78 | 1,14 | 62,11 |
| 0,31 | 0,77 | 1,12 | 64,71 |
| 0,32 | 0,78 | 1,1 | 63,3 |
| 0,33 | 0,76 | 1,14 | 63,48 |
| 0,34 | 0,77 | 1,09 | 64,21 |
| 0,35 | 0,78 | 1,11 | 63,68 |
| 0,36 | 0,76 | 1,07 | 64,72 |
| 0,37 | 0,77 | 1,09 | 63,41 |
| 0,38 | 0,76 | 1,12 | 62,71 |
| 0,39 | 0,76 | 1,15 | 62,93 |
| 0,4 | 0,77 | 1,09 | 64,07 |
| 0,41 | 0,75 | 1,14 | 62,95 |
| 0,42 | 0,74 | 1,16 | 64,12 |
| 0,43 | 0,75 | 1,09 | 64,53 |
| 0,44 | 0,74 | 1,14 | 63,4 |
| 0,45 | 0,75 | 1,07 | 64,36 |
| 0,46 | 0,75 | 1,09 | 64,92 |
| 0,47 | 0,76 | 1,11 | 63,77 |
| 0,48 | 0,72 | 1,04 | 65,88 |
| 0,49 | 0,74 | 1,13 | 62,87 |
| 0,5 | 0,75 | 1,06 | 65,45 |
| 0,51 | 0,73 | 1,12 | 63,79 |
| 0,52 | 0,76 | 1,19 | 62,36 |
| 0,53 | 0,74 | 1,21 | 62,04 |
| 0,54 | 0,75 | 1,11 | 64,18 |
| 0,55 | 0,75 | 1,1 | 64,32 |
| 0,56 | 0,74 | 1,22 | 60,79 |
| 0,57 | 0,73 | 1,13 | 63,97 |
| 0,58 | 0,74 | 1,1 | 64,05 |
| 0,59 | 0,74 | 1,11 | 64,06 |
| 0,6 | 0,74 | 1,13 | 63,29 |
| 0,61 | 0,73 | 1,15 | 63,87 |
| 0,62 | 0,72 | 1,12 | 65,31 |
| 0,63 | 0,71 | 1,2 | 62,57 |
| 0,64 | 0,73 | 1,09 | 64,51 |
| 0,65 | 0,71 | 1,12 | 63,96 |
| 0,66 | 0,74 | 1,18 | 62,51 |
| 0,67 | 0,72 | 1,12 | 63,68 |
| 0,68 | 0,71 | 1,15 | 62,6 |
| 0,69 | 0,73 | 1,09 | 64,88 |
| 0,7 | 0,74 | 1,16 | 62,42 |
| 0,71 | 0,72 | 1,08 | 64,36 |
| 0,72 | 0,75 | 1,15 | 63,02 |
| 0,73 | 0,73 | 1,1 | 64,12 |
| 0,74 | 0,72 | 1,15 | 63,32 |
| 0,75 | 0,72 | 1,18 | 63,36 |
| 0,76 | 0,71 | 1,1 | 65,08 |
| 0,77 | 0,72 | 1,1 | 64,31 |
| 0,78 | 0,73 | 1,24 | 60,9 |
| 0,79 | 0,72 | 1,15 | 62,61 |
| 0,8 | 0,72 | 1,1 | 64,01 |
| 0,81 | 0,73 | 1,32 | 59,95 |
| 0,82 | 0,72 | 1,14 | 63,82 |
| 0,83 | 0,71 | 1,22 | 61,33 |
| 0,84 | 0,73 | 1,16 | 62,86 |
| 0,85 | 0,72 | 1,16 | 62,71 |
| 0,86 | 0,71 | 1,19 | 64,73 |
| 0,87 | 0,72 | 1,13 | 63,92 |
| 0,88 | 0,71 | 1,16 | 62,53 |
| 0,89 | 0,72 | 1,12 | 63,96 |
| 0,9 | 0,71 | 1,16 | 62,82 |
| 0,91 | 0,71 | 1,15 | 64,61 |
| 0,92 | 0,72 | 1,14 | 63,11 |
| 0,93 | 0,73 | 1,13 | 63,71 |
| 0,94 | 0,7 | 1,13 | 62,7 |
| 0,95 | 0,72 | 1,17 | 63,52 |
| 0,96 | 0,73 | 1,17 | 63,09 |
| 0,97 | 0,7 | 1,1 | 64,65 |
| 0,98 | 0,72 | 1,22 | 61,51 |
| 0,99 | 0,73 | 1,114 | 63,57 |

**Supplementary Table S3**. **Accuracy, Train Loss, and Test Loss Values for Alpha Values in the ResNet-18 Model**

| **Poolalpha** | **Train_Loss** | **Test_Loss** | **Accuracy** |
| --- | --- | --- | --- |
| 0,1 | 0,49 | 0,63 | 78,21 |
| 0,11 | 0,46 | 0,61 | 79,24 |
| 0,12 | 0,46 | 0,59 | 79,58 |
| 0,13 | 0,47 | 0,59 | 79,83 |
| 0,14 | 0,47 | 0,61 | 79,22 |
| 0,15 | 0,46 | 0,59 | 79,61 |
| 0,16 | 0,46 | 0,6 | 79,18 |
| 0,17 | 0,46 | 0,59 | 79,58 |
| 0,18 | 0,46 | 0,6 | 78,97 |
| 0,19 | 0,46 | 0,6 | 79,52 |
| 0,2 | 0,47 | 0,62 | 78,54 |
| 0,21 | 0,47 | 0,64 | 77,92 |
| 0,22 | 0,46 | 0,58 | 79,82 |
| 0,23 | 0,46 | 0,62 | 78,37 |
| 0,24 | 0,47 | 0,63 | 78,26 |
| 0,25 | 0,47 | 0,59 | 79,56 |
| 0,26 | 0,47 | 0,6 | 79,12 |
| 0,27 | 0,47 | 0,59 | 79,63 |
| 0,28 | 0,48 | 0,61 | 78,94 |
| 0,29 | 0,47 | 0,61 | 79,02 |
| 0,3 | 0,46 | 0,62 | 78,49 |
| 0,31 | 0,46 | 0,59 | 79,53 |
| 0,32 | 0,47 | 0,65 | 77,01 |
| 0,33 | 0,46 | 0,6 | 79,11 |
| 0,34 | 0,46 | 0,61 | 78,91 |
| 0,35 | 0,47 | 0,64 | 78,39 |
| 0,36 | 0,47 | 0,63 | 78,53 |
| 0,37 | 0,46 | 0,61 | 78,63 |
| 0,38 | 0,47 | 0,64 | 78,07 |
| 0,39 | 0,46 | 0,6 | 78,79 |
| 0,4 | 0,46 | 0,61 | 79,08 |
| 0,41 | 0,45 | 0,59 | 79,16 |
| 0,42 | 0,47 | 0,63 | 78,59 |
| 0,43 | 0,47 | 0,63 | 78,07 |
| 0,44 | 0,46 | 0,62 | 78,49 |
| 0,45 | 0,47 | 0,62 | 78,8 |
| 0,46 | 0,47 | 0,62 | 78,49 |
| 0,47 | 0,46 | 0,61 | 78,74 |
| 0,48 | 0,47 | 0,63 | 77,88 |
| 0,49 | 0,47 | 0,62 | 78,45 |
| 0,5 | 0,46 | 0,61 | 79,08 |
| 0,51 | 0,47 | 0,59 | 79,74 |
| 0,52 | 0,47 | 0,6 | 79,2 |
| 0,53 | 0,47 | 0,6 | 78,96 |
| 0,54 | 0,47 | 0,61 | 78,63 |
| 0,55 | 0,46 | 0,59 | 79,69 |
| 0,56 | 0,47 | 0,61 | 78,98 |
| 0,57 | 0,47 | 0,61 | 78,62 |
| 0,58 | 0,47 | 0,61 | 79,2 |
| 0,59 | 0,48 | 0,63 | 78,21 |
| 0,6 | 0,46 | 0,61 | 78,76 |
| 0,61 | 0,46 | 0,62 | 78,57 |
| 0,62 | 0,46 | 0,65 | 77,48 |
| 0,63 | 0,46 | 0,61 | 79,11 |
| 0,64 | 0,46 | 0,6 | 79,65 |
| 0,65 | 0,47 | 0,61 | 78,63 |
| 0,66 | 0,47 | 0,6 | 79,27 |
| 0,67 | 0,48 | 0,63 | 78,6 |
| 0,68 | 0,46 | 0,61 | 78,84 |
| 0,69 | 0,46 | 0,6 | 79,28 |
| 0,7 | 0,46 | 0,6 | 79,24 |
| 0,71 | 0,47 | 0,61 | 78,53 |
| 0,72 | 0,46 | 0,6 | 79,39 |
| 0,73 | 0,46 | 0,63 | 78,06 |
| 0,74 | 0,46 | 0,62 | 78,49 |
| 0,75 | 0,47 | 0,64 | 77,51 |
| 0,76 | 0,47 | 0,64 | 78,19 |
| 0,77 | 0,45 | 0,6 | 78,88 |
| 0,78 | 0,47 | 0,61 | 79,05 |
| 0,79 | 0,46 | 0,62 | 78,58 |
| 0,8 | 0,46 | 0,59 | 79,46 |
| 0,81 | 0,47 | 0,6 | 79,51 |
| 0,82 | 0,47 | 0,6 | 79,8 |
| 0,83 | 0,47 | 0,63 | 78,94 |
| 0,84 | 0,47 | 0,6 | 79,45 |
| 0,85 | 0,47 | 0,65 | 77,7 |
| 0,86 | 0,47 | 0,6 | 79,26 |
| 0,87 | 0,47 | 0,6 | 78,91 |
| 0,88 | 0,47 | 0,61 | 79,1 |
| 0,89 | 0,47 | 0,61 | 79,18 |
| 0,9 | 0,47 | 0,64 | 77,49 |
| 0,91 | 0,46 | 0,63 | 78,2 |
| 0,92 | 0,46 | 0,6 | 79,28 |
| 0,93 | 0,46 | 0,62 | 78,44 |
| 0,94 | 0,47 | 0,63 | 78,48 |
| 0,95 | 0,47 | 0,59 | 79,65 |
| 0,96 | 0,46 | 0,6 | 79,18 |
| 0,97 | 0,46 | 0,59 | 80,14 |
| 0,98 | 0,46 | 0,6 | 79,23 |
| 0,99 | 0,46 | 0,62 | 78,99 |

**Supplementary Table S4**. **Accuracy, Train Loss, and Test Loss Values for Alpha Values in the AlexNet Model**

| **Poolalpha** | **Train_Loss** | **Test_Loss** | **Accuracy** |
| --- | --- | --- | --- |
| 0,1 | 0,33 | 0,69 | 78,45 |
| 0,11 | 0,33 | 0,75 | 77,51 |
| 0,12 | 0,32 | 0,64 | 79,7 |
| 0,13 | 0,32 | 0,74 | 77,4 |
| 0,14 | 0,31 | 0,69 | 79,33 |
| 0,15 | 0,32 | 0,68 | 79,16 |
| 0,16 | 0,31 | 0,71 | 79,2 |
| 0,17 | 0,31 | 0,71 | 78,96 |
| 0,18 | 0,3 | 0,7 | 79,36 |
| 0,19 | 0,3 | 0,69 | 78,79 |
| 0,2 | 0,31 | 0,68 | 79,77 |
| 0,21 | 0,3 | 0,66 | 79,29 |
| 0,22 | 0,31 | 0,67 | 79,37 |
| 0,23 | 0,31 | 0,64 | 80 |
| 0,24 | 0,3 | 0,69 | 78,18 |
| 0,25 | 0,3 | 0,7 | 79,26 |
| 0,26 | 0,31 | 0,67 | 79,6 |
| 0,27 | 0,3 | 0,72 | 78,72 |
| 0,28 | 0,3 | 0,66 | 80,17 |
| 0,29 | 0,3 | 0,64 | 79,65 |
| 0,3 | 0,3 | 0,7 | 79,07 |
| 0,31 | 0,3 | 0,68 | 78,87 |
| 0,32 | 0,3 | 0,64 | 80,78 |
| 0,33 | 0,29 | 0,66 | 80,39 |
| 0,34 | 0,3 | 0,72 | 78,28 |
| 0,35 | 0,3 | 0,67 | 79,2 |
| 0,36 | 0,29 | 0,67 | 80,11 |
| 0,37 | 0,29 | 0,74 | 78,59 |
| 0,38 | 0,29 | 0,67 | 79,27 |
| 0,39 | 0,29 | 0,68 | 80,06 |
| 0,4 | 0,3 | 0,65 | 79,55 |
| 0,41 | 0,29 | 0,67 | 79,51 |
| 0,42 | 0,3 | 0,65 | 80,14 |
| 0,43 | 0,29 | 0,65 | 79,77 |
| 0,44 | 0,29 | 0,65 | 80,26 |
| 0,45 | 0,28 | 0,62 | 80,53 |
| 0,46 | 0,29 | 0,68 | 79,78 |
| 0,47 | 0,29 | 0,69 | 79,54 |
| 0,48 | 0,28 | 0,72 | 79,33 |
| 0,49 | 0,3 | 0,66 | 79,56 |
| 0,5 | 0,28 | 0,64 | 80,29 |
| 0,51 | 0,29 | 0,68 | 79,45 |
| 0,52 | 0,28 | 0,63 | 80,72 |
| 0,53 | 0,27 | 0,64 | 80,37 |
| 0,54 | 0,29 | 0,72 | 79,04 |
| 0,55 | 0,28 | 0,66 | 79,45 |
| 0,56 | 0,29 | 0,66 | 79,64 |
| 0,57 | 0,29 | 0,65 | 80,48 |
| 0,58 | 0,28 | 0,64 | 80,67 |
| 0,59 | 0,28 | 0,66 | 80,39 |
| 0,6 | 0,29 | 0,68 | 79,8 |
| 0,61 | 0,29 | 0,68 | 79,73 |
| 0,62 | 0,28 | 0,68 | 79,59 |
| 0,63 | 0,28 | 0,66 | 79,77 |
| 0,64 | 0,28 | 0,66 | 80,2 |
| 0,65 | 0,29 | 0,69 | 79,73 |
| 0,66 | 0,28 | 0,75 | 77,45 |
| 0,67 | 0,28 | 0,69 | 79,26 |
| 0,68 | 0,28 | 0,69 | 80,27 |
| 0,69 | 0,28 | 0,68 | 79,84 |
| 0,7 | 0,28 | 0,64 | 80,35 |
| 0,71 | 0,28 | 0,66 | 80,06 |
| 0,72 | 0,28 | 0,63 | 81,12 |
| 0,73 | 0,28 | 0,66 | 80 |
| 0,74 | 0,28 | 0,7 | 79,09 |
| 0,75 | 0,29 | 0,66 | 80,23 |
| 0,76 | 0,28 | 0,76 | 77,94 |
| 0,77 | 0,29 | 0,64 | 80,31 |
| 0,78 | 0,28 | 0,67 | 80,25 |
| 0,79 | 0,28 | 0,73 | 78,9 |
| 0,8 | 0,29 | 0,79 | 78,6 |
| 0,81 | 0,28 | 0,67 | 80,61 |
| 0,82 | 0,29 | 0,67 | 79,7 |
| 0,83 | 0,28 | 0,65 | 79,96 |
| 0,84 | 0,28 | 0,78 | 77,35 |
| 0,85 | 0,28 | 0,68 | 80,46 |
| 0,86 | 0,28 | 0,67 | 79,51 |
| 0,87 | 0,29 | 0,66 | 80,09 |
| 0,88 | 0,29 | 0,68 | 79,79 |
| 0,89 | 0,28 | 0,73 | 78,68 |
| 0,9 | 0,29 | 0,64 | 79,78 |
| 0,91 | 0,29 | 0,65 | 80,14 |
| 0,92 | 0,28 | 0,73 | 79,73 |
| 0,93 | 0,28 | 0,74 | 78,78 |
| 0,94 | 0,29 | 0,7 | 79,51 |
| 0,95 | 0,29 | 0,62 | 80,7 |
| 0,96 | 0,28 | 0,65 | 80,31 |
| 0,97 | 0,29 | 0,7 | 79,87 |
| 0,98 | 0,29 | 0,71 | 78,86 |
| 0,99 | 0,29 | 0,67 | 80,05 |
